# Supplementary material for: Protonation-Guided Design and Evaluation of Selective PET Tracers for Light Chain Cardiac Amyloidosis
Source: Research Square preprint supplement (doi:10.21203/rs.3.rs-7823866/v1), 2026-02-03
Supplement: Supplementary file 2 [file e2ccfb1238e2a4c399a2fbef.docx]

**Clinical Study of [18F]FT8 PET/CT in the Evaluation of Amyloidosis**

**Background**

Immunoglobulin light chain amyloidosis (AL) is caused by the deposition of amyloid fibrils formed from misfolded immunoglobulin light chains, and is often associated with plasma cell disorders such as multiple myeloma.

AL is one of the more common and rapidly progressive subtypes of systemic amyloidosis. Its clinical manifestations are highly variable and nonspecific, depending primarily on the organs involved. Cardiac involvement may lead to heart failure and arrhythmias; renal involvement can result in nephrotic syndrome, proteinuria, and renal failure; and neurological involvement may cause peripheral neuropathy or autonomic dysfunction. Without timely diagnosis and treatment, patients typically survive only 1–2 years after diagnosis.

[18F]FT8, a derivative of 18F-1-(4-pyridyl)-4-piperazinyl arene ([18F]TPZA), exhibits high affinity for AL amyloid in myocardial tissue sections and shows no significant binding to transthyretin amyloid. This probe has demonstrated favorable biosafety and pharmacokinetic profiles in vivo. With its excellent diagnostic potential, [18F]FT8 may help address critical gaps in current diagnostic approaches for AL amyloidosis.

**Objective**

This study aims to evaluate the diagnostic potential of [18F]FT8 positron emission tomography (PET) in patients with suspected amyloidosis. By comparing its performance against established clinical methods, such as echocardiography, contrast-enhanced MRI, and relevant laboratory tests, we seek to establish and validate a robust PET-based protocol for the diagnosis and differential diagnosis of amyloidotic diseases.

**Description**

Study Type: Observational, patient registry;

Study Population:

1. Inclusion Criteria: patients must meet all of the following criteria:

(i) Adult patients (aged 18 years or order);

(ii) Patients with suspected or new diagnosed or previously treated cardiac amyloidosis (supporting evidence may include MRI, CT, serum markers and pathology report);

(iii) Patients who had scheduled Pan-Amyloid PET/CT scan;

(iv) Patients who were able to provide informed consent (signed by participant, parent or legal representative) and assent according to the guidelines of the Clinical Research Ethics Committee.

2. Exclusion Criteria:

(i) Patients with non-CA lesions;

(ii) Patients with pregnancy;

(iii) The inability or unwillingness of the research participant, parent or legal representative to provide written informed consent.

Number of patients intended to be recruited: A total of 20 patients is planned to be enrolled in this study.

Primary outcomes: Standardized uptake value (SUV) of [18F]FT8 PET/CT in organs involved by AL amyloidosis.

Secondary outcomes: Detection rate of [18F]FT8 PET/CT in organs involved by AL amyloidosis.

Exploratory outcomes: Correlation between [18F]FT8 PET/CT findings and echocardiographic parameters as well as hematologic laboratory indices, along with a preliminary assessment of its prognostic value.
